# Supplementary material for: Impaired branched-chain amino acid metabolism may underlie the nonalcoholic fatty liver disease-like pathology of neonatal testosterone-treated female rats
Source: PubMed Central journal article supplement (PMC5640623; doi:10.1038/s41598-017-13451-8), 2017-10-13
Supplement: 41598_2017_13451_MOESM1_ESM.pdf [file 41598_2017_13451_MOESM1_ESM.pdf]

## Supplementary Information

### **Impaired branched-chain amino acid metabolism may underlie the nonalcoholic fatty liver disease-like pathology of neonatal testosterone-treated female rats**

Álvaro Anzai,<sup>1,+</sup> Rodrigo R. Marcondes,<sup>1,+,\*</sup> Thiago H. Gonçalves,<sup>1</sup> Kátia C. Carvalho,<sup>1</sup> Manuel J. Simões,<sup>2</sup> Natália Garcia,<sup>1</sup> José M. Soares Jr,<sup>1</sup> Vasantha Padmanabhan,<sup>3</sup> Edmund C. Baracat,<sup>1</sup> Ismael D. C. G. da Silva,<sup>4</sup> Gustavo A. R. Maciel<sup>1,\*</sup>

<sup>1</sup>Laboratorio de Ginecologia Estrutural e Molecular (LIM 58), Disciplina de Ginecologia, Faculdade de Medicina FMUSP, Universidade de Sao Paulo, Sao Paulo, SP 01246903, BR; <sup>2</sup>Departamento de Morfologia e Genetica, Disciplina de Histologia e Biologia Estrutural, Universidade Federal de Sao Paulo, Sao Paulo, SP 04023900, BR; <sup>3</sup>Department of Pediatrics, University of Michigan, Ann Arbor, Michigan 48109, USA; and <sup>4</sup>Laboratorio de Ginecologia Molecular e Proteomica, Departamento de Ginecologia, Universidade Federal de Sao Paulo, Sao Paulo, SP 04024002, BR

\*These authors contributed equally to this work

#### **\*Corresponding authors information:**

Gustavo A. R. Maciel and Rodrigo R. Marcondes. Avenida Dr. Arnaldo, 455, sala 4124, São Paulo-SP 01246903, Brazil. Phone number: +0551130617486. E-mails: [gustavo.maciел@hc.fm.usp.br](mailto:gustavo.maciел@hc.fm.usp.br) and [marcondes\\_rr@hotmail.com](mailto:marcondes_rr@hotmail.com)

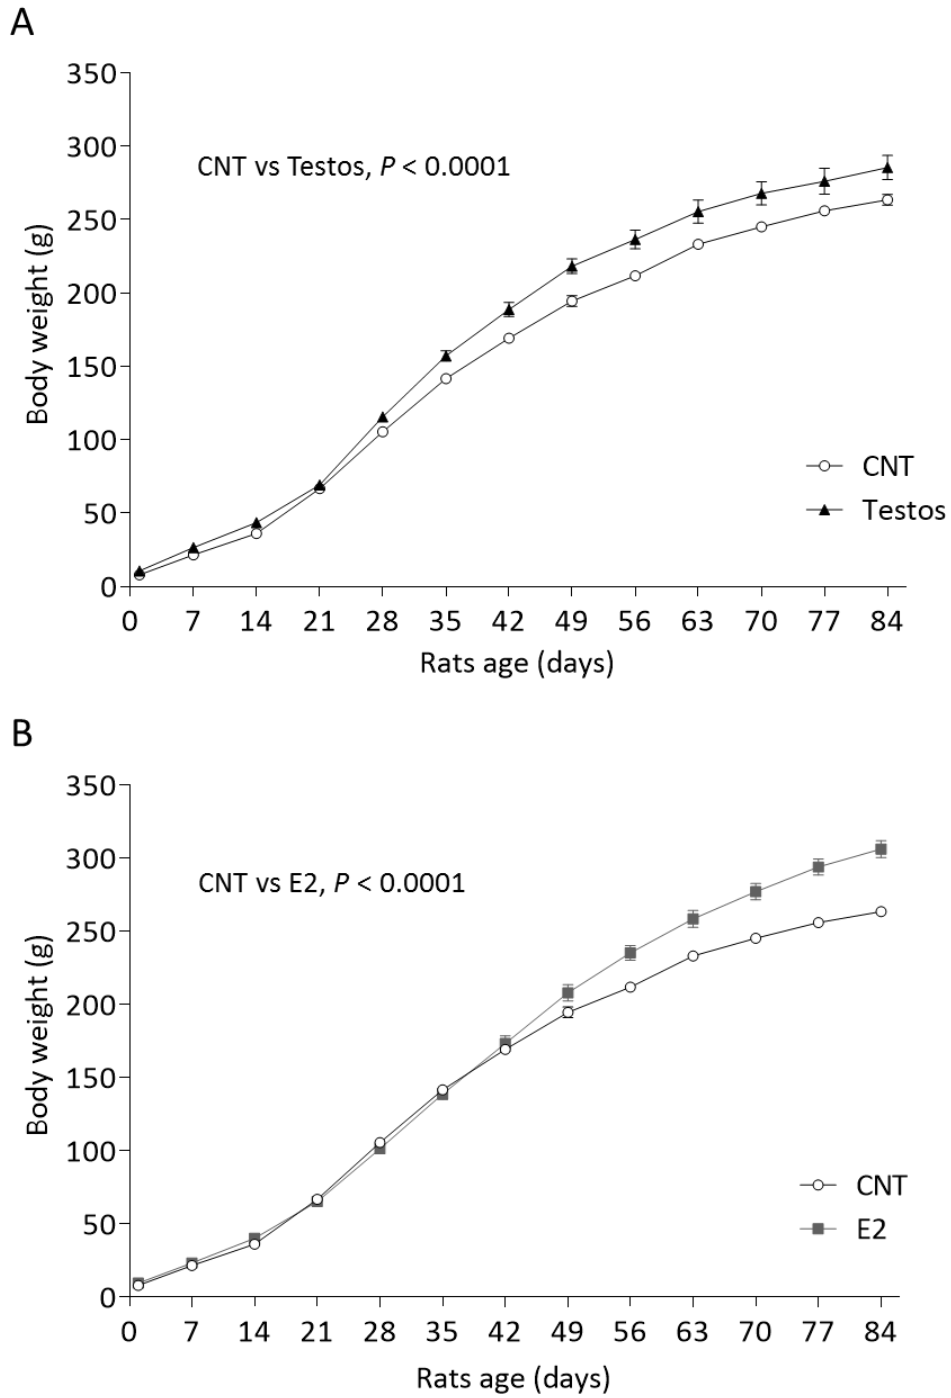

**Supplemental Figure S1.** Growth curve of animals in control (CNT), E2 and Testos groups. Panel A: CNT vs. Testos, Panel B: CNT vs. E2. Data are shown as mean  $\pm$  SEM. Asterisks denote significant differences from control.

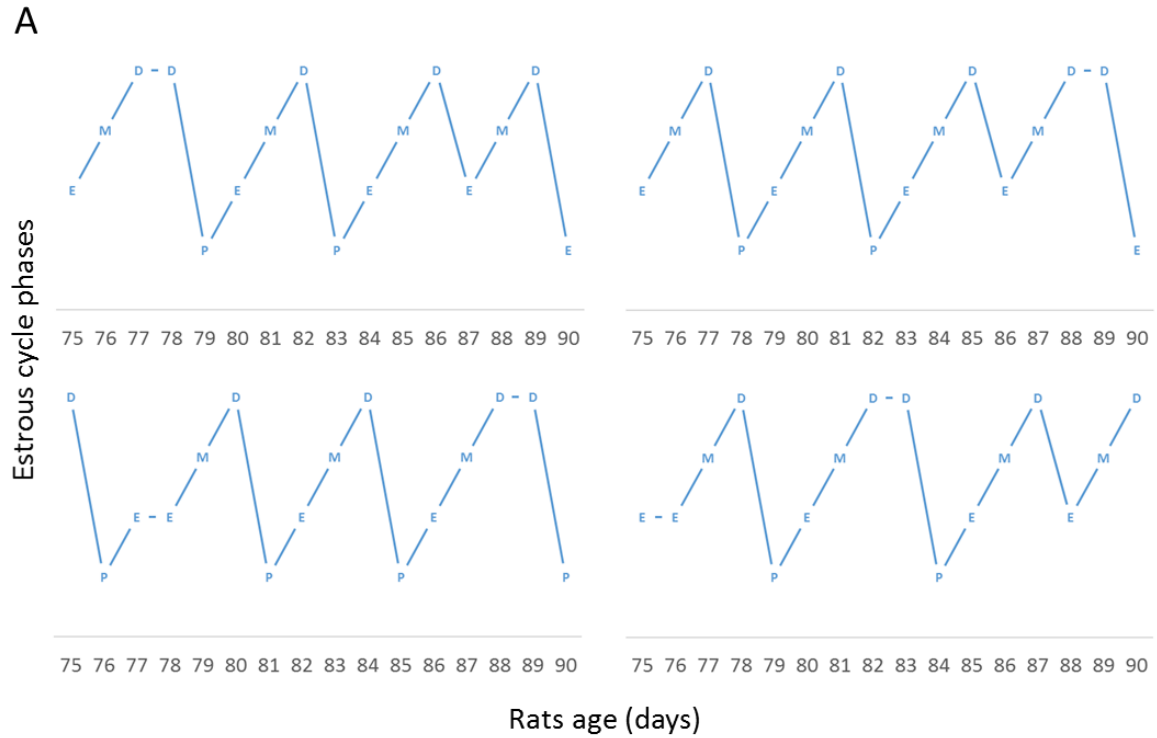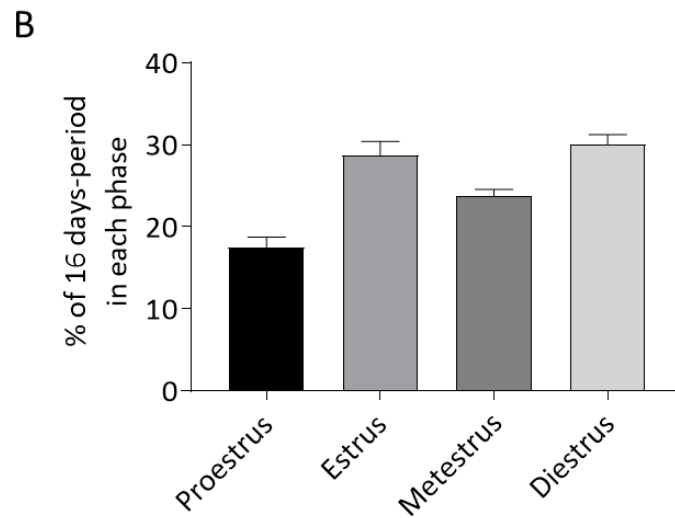

**Supplemental Figure S2.** Estrous cycle dynamics in control rats. Panel A: Representative patterns of estrous cyclicity in 4 controls. Panel B: Percentage of time spend at each estrous cycle phase. Data are shown as mean  $\pm$  SEM. P, proestrus; E, estrus; M, metestrus; D, diestrus.

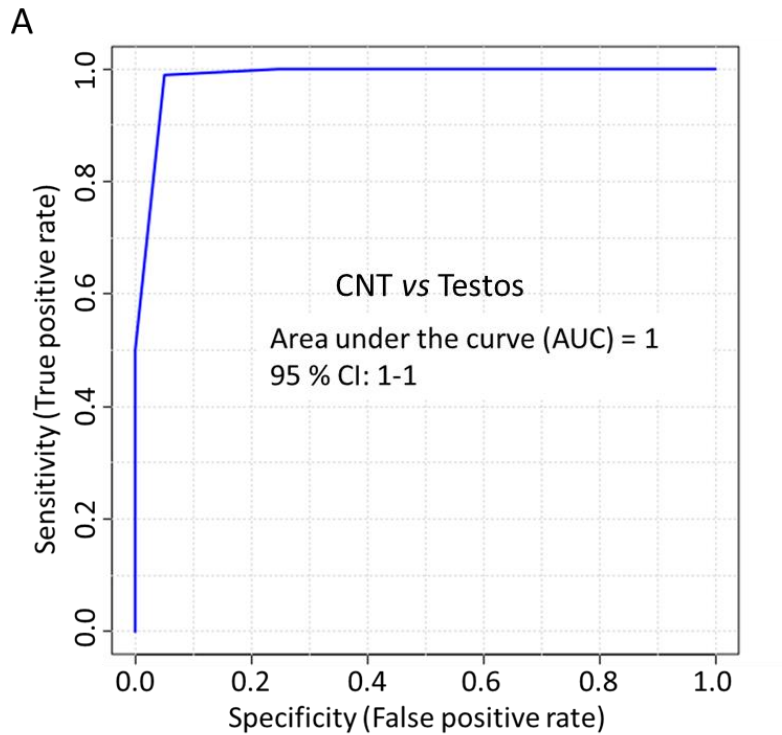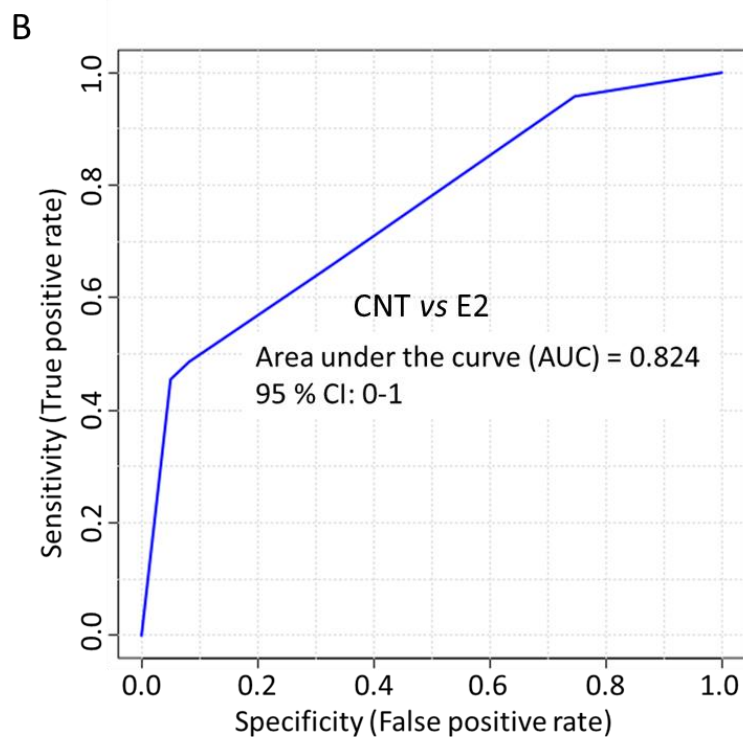

**Supplemental Figure S3.** Receiver operating characteristic (ROC) curves with area under the curve (AUC) for metabolites that differ significantly between groups. ROC curves with AUC and confidence intervals (CI) values for (A) control (CNT) vs Testos group, and (B) control vs E2 group.

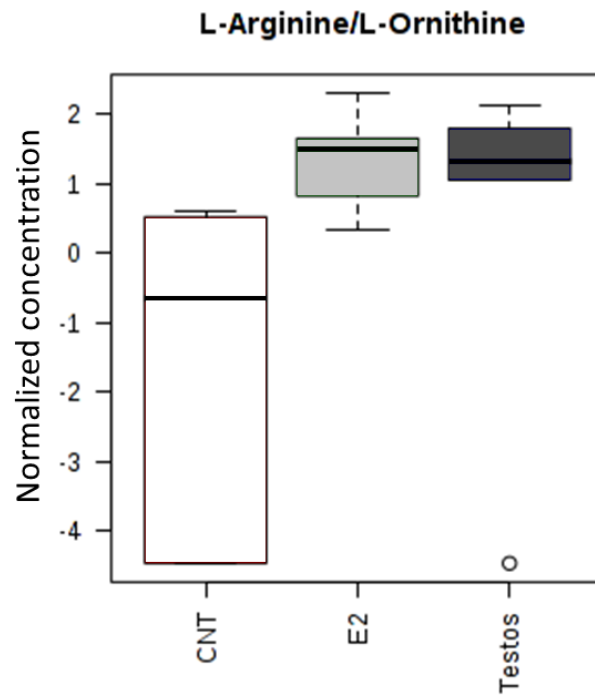

**Supplemental Figure S4.** L-arginine to L-ornithine ratio (arginase activity).

**Supplemental Table S1.** Specific amino acid groupings and metabolite ratios for assessment of enzyme activity

| <b>Enzymes and AA groups</b>                | <b>Formula</b>                                                                 |
|---------------------------------------------|--------------------------------------------------------------------------------|
| <b>AA groupings</b>                         |                                                                                |
| Aromatic AA (AAA)                           | Tyr + Phe                                                                      |
| Branched-chain AA (BCAA)                    | Ile + Leu + Val                                                                |
| Glucogenic AA                               | Ala + Arg + Asn + Asp + Cys + Glu + Gln + Gly<br>+ His + Met + Pro + Ser + Val |
| Glutaminolysis AA                           | Ala + Asp + Glu                                                                |
| Ketogenic AA                                | Leu + Lys                                                                      |
| <b>Enzyme activity</b>                      |                                                                                |
| Carbamoyl phosphate synthetase 1 (CPS1)     | Gly / Arg                                                                      |
| Carnitine palmitoyltransferase 1 (CPT1)     | C0 / (C16 + C18)                                                               |
| Fatty acid elongase 2 (ELOVL2)              | PC aa C40:3 / PC aa C42:5                                                      |
| Glucokinase regulator (GCKR)                | PC ae C34:2 / PC aa C32:2                                                      |
| Solute carrier family 16 member 9 (SLC16A9) | Arg / C0                                                                       |
| Solute carrier family 22 member 4 (SLC22A4) | Val / C5                                                                       |

Amino acids (AA), Alanine (Ala), Arginine (Arg), Asparagine (Asn), Aspartic (Asp), Cysteine (Cys), Glutamic (Glu), Glutamine (Gln), Glycine (Gly), Histidine (His), Leucine (Leu), Lysine (Lys), Methionine (Met), Proline (Pro), Serine (Ser), Valine (Val), Carnitine (C0), Valerylcarnitine (C5), Hexadecanoylcarnitine (C16), and Octadecanoylcarnitine (C18).

**Supplemental Table S2.** Gonadotropins and sex steroid levels in control (CNT), E2 and Testos groups

|                      | <b>CNT<br/>(n=10)</b> | <b>E2<br/>(n=10)</b> | <b>Testos<br/>(n=10)</b> | <b>P value</b> |
|----------------------|-----------------------|----------------------|--------------------------|----------------|
| LH (ng/ml)           | 11.4 ± 2.3            | 9.9 ± 1.1            | 18.4 ± 1.8*              | 0.001          |
| FSH (ng/ml)          | 7.5 ± 1.5             | 6.8 ± 0.8            | 5.79 ± 0.7               | NS             |
| LH/FSH ratio         | 2.8 ± 1.2             | 1.6 ± 0.3            | 3.6 ± 0.5                | NS             |
| Testosterone (ng/ml) | 3.3 ± 0.4             | 6.0 ± 1.7            | 5.4 ± 0.7*               | 0.01           |
| Estradiol (pg/ml)    | 5.9 ± 1.6             | 10.3 ± 1.6           | 4.9 ± 1.0                | NS             |

Data is presented as mean ± SEM. LH, luteinizing hormone; FSH, follicle-stimulating hormone; NS, not significant. Asterisks denote significant differences from control.

**Supplementary Table S3.** Enrichment analysis of pathways related to metabome profile in the testosterone and estradiol groups

| <b>Pathway name</b>                        | <b>Total</b> | <b>Hits</b> | <b>P value</b> | <b>FDR</b> |
|--------------------------------------------|--------------|-------------|----------------|------------|
| <i>Testosterone group</i>                  |              |             |                |            |
| Valine, leucine and isoleucine degradation | 36           | 3           | 0.002556       | 0.089452   |
| Protein biosynthesis                       | 19           | 17          | 0.029438       | 0.43253    |
| Betaine metabolism                         | 10           | 1           | 0.037074       | 0.43253    |
| <i>Estradiol group</i>                     |              |             |                |            |
| Oxidation of branched chain fatty acids    | 14           | 2           | 0.046058       | 0.95665    |

FDR, False discovery rate.



**Supplementary Table S4.** Enrichment analysis of enzyme activity related to metabome profile in the testosterone group

| Enzyme name                                                                         | Total | Hits | P value   | FDR      |
|-------------------------------------------------------------------------------------|-------|------|-----------|----------|
| 2-Methylprop-2-enoyl-CoA (2-Methylbut-2-enoyl-CoA), mitochondrial                   | 1     | 1    | 8,2036E-4 | 0.014985 |
| 2-oxoisovalerate dehydrogenase (acylating; 3-methyl-2-oxopentanoate), mitochondrial | 1     | 1    | 8,2036E-4 | 0.014985 |
| 3-hydroxyacyl-CoA dehydrogenase (2-Methylacetoacetyl-CoA), mitochondrial            | 1     | 1    | 8,2036E-4 | 0.014985 |
| acetyl-CoA C-acetyltransferase, mitochondrial                                       | 1     | 1    | 8,2036E-4 | 0.014985 |
| acyl-CoA dehydrogenase (2-methylbutanoyl-CoA), mitochondrial                        | 1     | 1    | 8,2036E-4 | 0.014985 |
| Isoleucine mitochondrial transport                                                  | 1     | 1    | 8,2036E-4 | 0.014985 |
| isoleucine transaminase, mitochondrial                                              | 1     | 1    | 8,2036E-4 | 0.014985 |
| L-isoleucine transport via diffusion (extracellular to cytosol)                     | 1     | 1    | 8,2036E-4 | 0.014985 |
| methylmalonyl-CoA mutase                                                            | 8     | 1    | 8,2036E-4 | 0.014985 |
| Propionyl-CoA carboxylase, mitochondrial                                            | 8     | 1    | 8,2036E-4 | 0.014985 |
| 2-oxoisovalerate dehydrogenase (acylating; 4-methyl-2-oxopentaoate), mitochondrial  | 1     | 1    | 0.0012048 | 0.014985 |
| acyl-CoA dehydrogenase (isovaleryl-CoA), mitochondrial                              | 1     | 1    | 0.0012048 | 0.014985 |
| leucine mitochondrial transport                                                     | 1     | 1    | 0.0012048 | 0.014985 |

|                                                                             |    |   |           |          |
|-----------------------------------------------------------------------------|----|---|-----------|----------|
| leucine transaminase, mitochondrial                                         | 1  | 1 | 0.0012048 | 0.014985 |
| methylcrotonoyl-CoA carboxylase,<br>mitochondrial                           | 1  | 1 | 0.0012048 | 0.014985 |
| methylglutaconyl-CoA hydratase (reversible),<br>mitochondrial               | 1  | 1 | 0.0012048 | 0.014985 |
| Arginine/Lysine exchanger (Arg in)                                          | 1  | 1 | 0.0038778 | 0.040615 |
| L-arginine transport in via sodium symport                                  | 1  | 1 | 0.0038778 | 0.040615 |
| L-arginine transport via diffusion (extracellular<br>to cytosol)            | 1  | 1 | 0.0038778 | 0.040615 |
| 5-Hydroxy-L-tryptophan decarboxy-lyase                                      | 3  | 1 | 0.0087959 | 0.050011 |
| 5-Hydroxy-L-tryptophan exchange                                             | 3  | 1 | 0.0087959 | 0.050011 |
| L-Tryptophan,tetrahydrobiopterin:oxygen<br>oxidoreductase (5-hydroxylating) | 3  | 1 | 0.0087959 | 0.050011 |
| Serotonin exchange                                                          | 3  | 1 | 0.0087959 | 0.050011 |
| L-tryptophan transport                                                      | 1  | 1 | 0.0087959 | 0.050011 |
| 3-Hydroxy-L-kynurenine hydrolase                                            | 21 | 1 | 0.0087959 | 0.050011 |
| 3-hydroxyanthranilate 3,4-dioxygenase                                       | 21 | 1 | 0.0087959 | 0.050011 |
| 5-hydroxy-L-tryptophan secretion via secretory<br>vesicle (ATP driven)      | 21 | 1 | 0.0087959 | 0.050011 |
| kynurenine 3-monooxygenase                                                  | 21 | 1 | 0.0087959 | 0.050011 |
| L-Tryptophan:oxygen 2,3-oxidoreductase<br>(decyclizing)                     | 21 | 1 | 0.0087959 | 0.050011 |
| N-Formyl-L-kynurenine amidohydrolase                                        | 21 | 1 | 0.0087959 | 0.050011 |

|                                                                       |    |   |           |          |
|-----------------------------------------------------------------------|----|---|-----------|----------|
| nicotinate-nucleotide diphosphorylase<br>(carboxylating)              | 21 | 1 | 0.0087959 | 0.050011 |
| Quinolinate Synthase (Eukaryotic)                                     | 21 | 1 | 0.0087959 | 0.050011 |
| 2-aminomuconate reductase                                             | 20 | 1 | 0.0087959 | 0.050011 |
| aminomuconate-semialdehyde dehydrogenase                              | 20 | 1 | 0.0087959 | 0.050011 |
| picolinic acid decarboxylase                                          | 20 | 1 | 0.0087959 | 0.050011 |
| L-phenylalanine transport via diffusion<br>(extracellular to cytosol) | 1  | 1 | 0.025719  | 0.14217  |
| cystathionine beta-synthase                                           | 6  | 1 | 0.037074  | 0.17994  |
| cystathionine g-lyase                                                 | 6  | 1 | 0.037074  | 0.17994  |
| L-methionine transport via diffusion<br>(extracellular to cytosol)    | 1  | 1 | 0.037074  | 0.17994  |
| Adenosylhomocysteinase                                                | 16 | 1 | 0.037074  | 0.17994  |
| methionine adenosyltransferase                                        | 16 | 1 | 0.037074  | 0.17994  |

FDR. False discovery rate.

**Supplementary Table S5.** Enrichment analysis of enzyme activity related to metabome profile in the estradiol group

| <b>Enzyme name</b>                                            | <b>Total</b> | <b>Hits</b> | <b>P value</b> | <b>FDR</b> |
|---------------------------------------------------------------|--------------|-------------|----------------|------------|
| Arginine/Lysine exchanger (Arg in)                            | 1            | 1           | 0.024784       | 0.77695    |
| L-arginine transport in via sodium symport                    | 1            | 1           | 0.024784       | 0.77695    |
| L-arginine transport via diffusion (extracellular to cytosol) | 1            | 1           | 0.024784       | 0.77695    |
| fatty-acid--CoA ligase (octanoate)                            | 1            | 1           | 0.048465       | 0.77695    |
| Octanoate transport via diffusion                             | 1            | 1           | 0.048465       | 0.77695    |

FDR. False discovery rate.
